# Supplementary material for: Construction of a combined hypoxia and EMT index for head and neck squamous cell carcinoma
Source: Front Cell Dev Biol. 2022 Aug 15;10:961858. doi: 10.3389/fcell.2022.961858 (PMC9420946; doi:10.3389/fcell.2022.961858)
Supplement: Supplementary file 3 [file Table4.XLSX]

## Sheet: supplementaty table GSEA result
ID	Description	setSize	enrichmentScore	NES	pvalue	p.adjust	qvalues	rank	leading_edge	core_enrichment
GO_B_CELL_ACTIVATION	GO_B_CELL_ACTIVATION	242	0.465721	1.3216	0.0020502	0.0371067	0.031404	4976	tags=38%, list=24%, signal=29%	BLK/MS4A1/LEF1/CD79A/CD22/NKX2-3/CD38/NFATC2/CARD11/CDH17/MFNG/CD27/POU2F2/KIT/TLR9/CD180/ONECUT1/CMTM7/TNFSF4/FCRL3/CXCR5/VCAM1/BCL6/TNFRSF13C/ZAP70/FLT3/TBC1D10C/FOXJ1/AICDA/CD19/LAX1/MEF2C/LFNG/TBX21/TFRC/ITGA4/BANK1/TNFRSF13B/ITM2A/PKN1/TNFRSF4/INPP5D/CD70/IKZF3/SLAMF8/LYL1/TP53/BTK/XBP1/BCL2/IL7R/POU2AF1/CD40LG/PLCL2/DNAJB9/CD79B/PLCG2/BATF/TLR4/PRKCB/HHEX/NTRK1/EXOSC3/C17orf99/GAPT/PCID2/TN…
GO_MATURE_B_CELL_DIFFERENTIATION	GO_MATURE_B_CELL_DIFFERENTIATION	28	0.662992	1.61629	0.00288025	0.0463316	0.0392112	4696	tags=68%, list=23%, signal=52%	NKX2-3/CDH17/MFNG/POU2F2/CMTM7/CD19/LFNG/ITM2A/SLAMF8/XBP1/POU2AF1/PLCL2/PLCG2/C17orf99/ADA/FCGR2B/PTK2B/ITFG2/DOCK10
GO_POSITIVE_T_CELL_SELECTION	GO_POSITIVE_T_CELL_SELECTION	35	0.669096	1.68034	0.000432807	0.012492	0.0105722	4339	tags=66%, list=21%, signal=52%	THEMIS/TOX/SHH/CD3G/LY9/ZAP70/TBX21/IL23R/IL23A/FOXN1/SLAMF6/BCL2/IRF4/BATF/CD3E/CD3D/IL12RB1/IL12B/LOXL3/PTPRC/DOCK2/SPN/FOXP3
GO_T_CELL_ACTIVATION	GO_T_CELL_ACTIVATION	463	0.434883	1.24898	0.0019999	0.0367419	0.0310952	5400	tags=39%, list=26%, signal=29%	PCK1/PLA2G2D/GLI2/IGFBP2/EPO/IGF1/CAMK4/LEF1/HLA-G/CCL21/ARG1/MYB/FZD7/GRAP2/ZBTB16/MICB/THEMIS/DPP4/TOX/BMP4/CCL19/NKX2-3/NFATC2/CD5/SHH/SIT1/CARD11/CD27/LCK/CD3G/KIT/IL12A/TNFSF4/VCAM1/BCL6/LY9/TNFRSF13C/THY1/ZAP70/CLC/TMIGD2/LILRB4/GPNMB/PAK3/FOXJ1/CCR7/CD8B/ADORA2A/AIRE/CD7/ITK/LAX1/RASAL3/LFNG/TBX21/IL23R/TFRC/WNT1/IL23A/GSN/LGALS9/FOXN1/TNFRSF18/BTLA/ZNF683/TNFRSF4/SOCS1/SLA2/PRKCQ/DLL4/PIK…
GO_T_CELL_DIFFERENTIATION	GO_T_CELL_DIFFERENTIATION	244	0.466257	1.32341	0.0020004	0.0367419	0.0310952	5336	tags=42%, list=26%, signal=32%	PCK1/PLA2G2D/GLI2/CAMK4/LEF1/HLA-G/MYB/FZD7/ZBTB16/THEMIS/TOX/BMP4/CCL19/NKX2-3/NFATC2/SHH/CARD11/CD27/LCK/CD3G/KIT/IL12A/TNFSF4/BCL6/LY9/ZAP70/LILRB4/FOXJ1/CCR7/AIRE/ITK/LFNG/TBX21/IL23R/WNT1/IL23A/LGALS9/FOXN1/TNFRSF18/ZNF683/SOCS1/DLL4/ZEB1/PRR7/SLAMF6/GPR18/IL2RA/TP53/XBP1/FZD8/BCL2/IL7R/NRARP/SATB1/DTX1/IRF4/BATF/CD8A/CD3E/CD3D/IL12RB1/RORC/CR1/ADA/PAX1/IL12B/MDK/CD83/LOXL3/PTGER4/EOMES/TMEM…
